# Supplementary material for: Interpreting and analyzing King Tide in Tuvalu
Source: Copernicus journal article supplement (doi:10.5194/nhess-14-209-2014), 2014-02-05
Supplement: Supplementary file 1 [file nhess-14-209-2014-supplement.pdf]

Sea Surface Height Anomaly 19940223

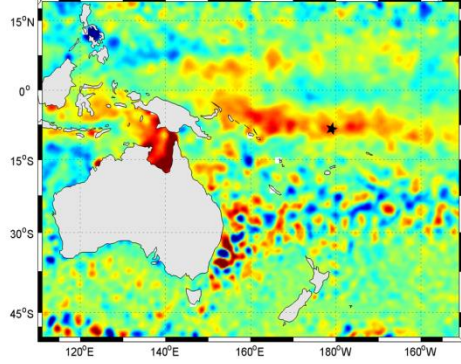

Sea Surface Height Anomaly 19960124

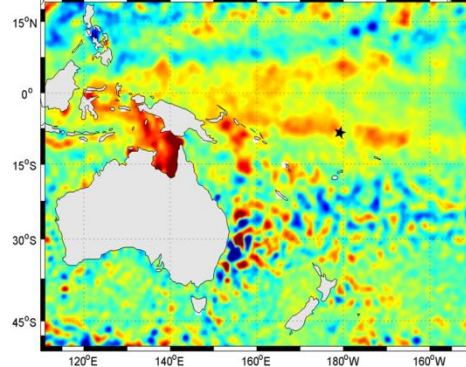

Sea Surface Height Anomaly 19960221

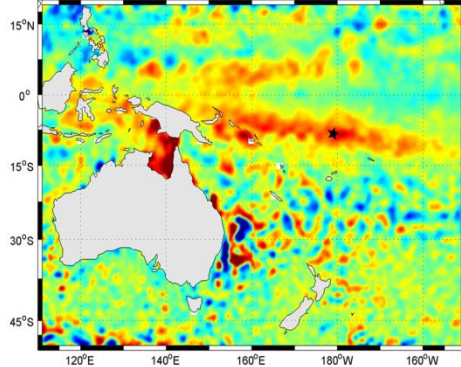

Sea Surface Height Anomaly 19960320

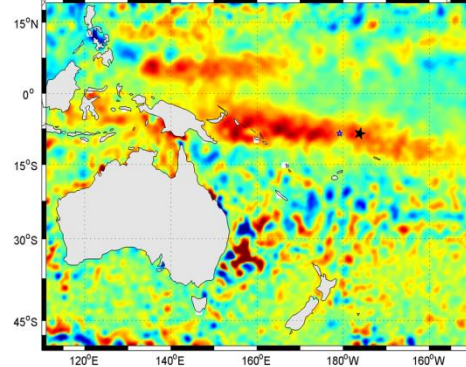

Sea Surface Height Anomaly 19970205

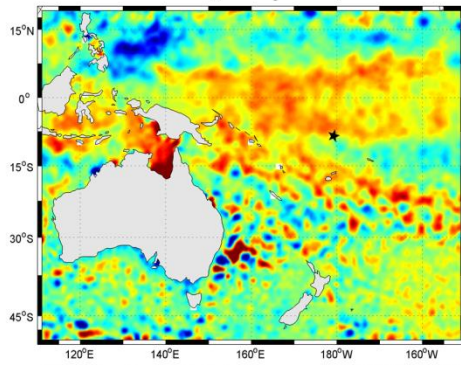

Sea Surface Height Anomaly 19970312

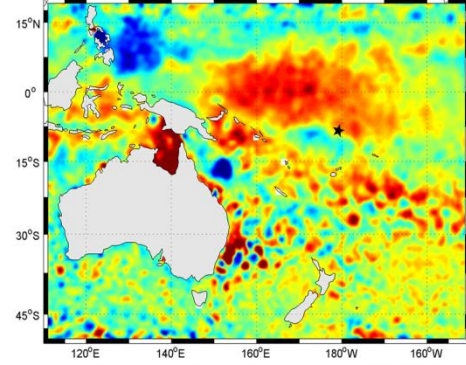

Sea Surface Height Anomaly 19990203

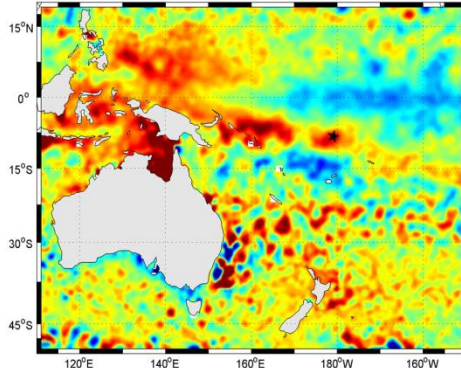

Sea Surface Height Anomaly 20000119

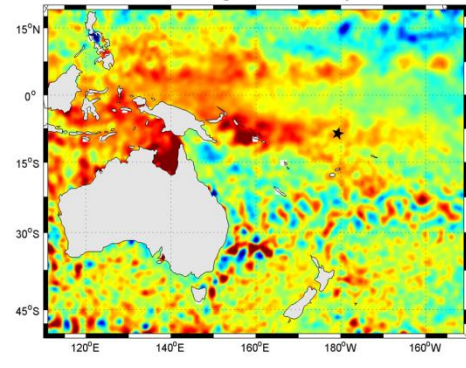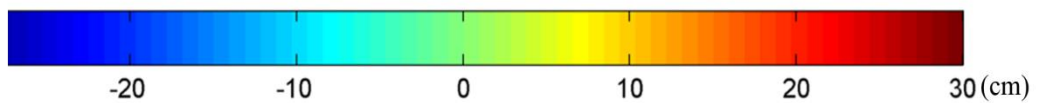



Sea Surface Height Anomaly 20010207

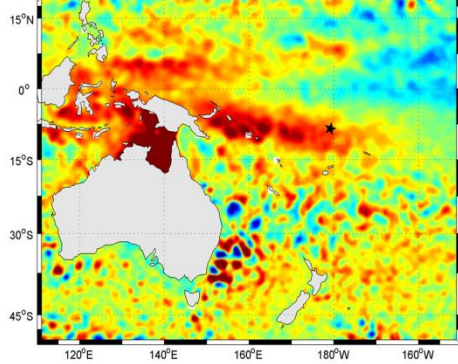

Sea Surface Height Anomaly 20010307

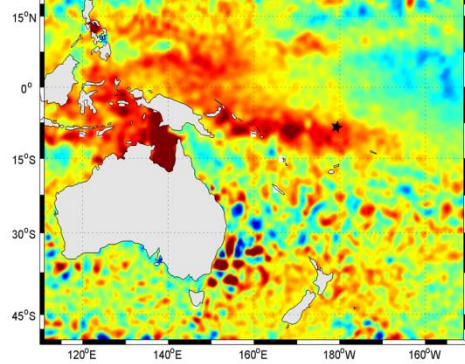

Sea Surface Height Anomaly 20020130

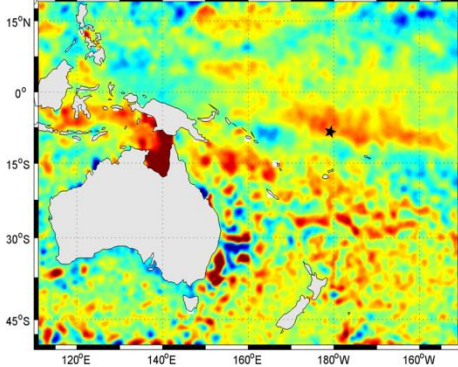

Sea Surface Height Anomaly 20020227

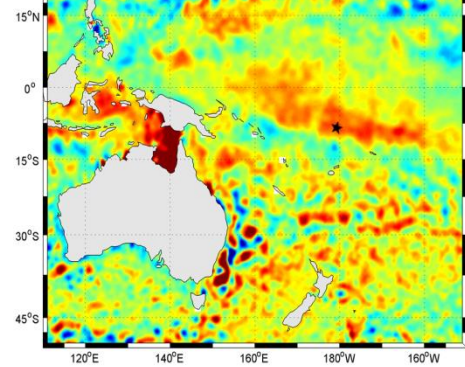

Sea Surface Height Anomaly 20020327

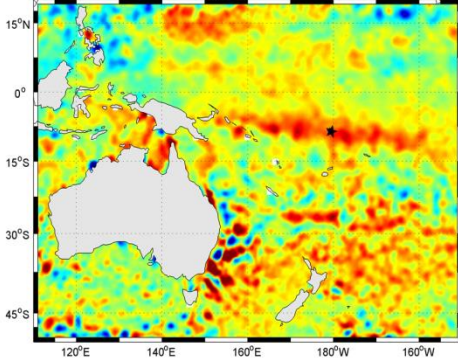

Sea Surface Height Anomaly 20030416

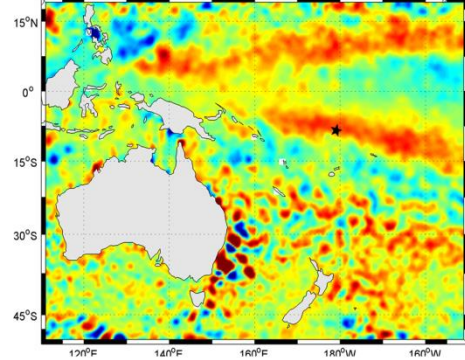

Sea Surface Height Anomaly 20030514

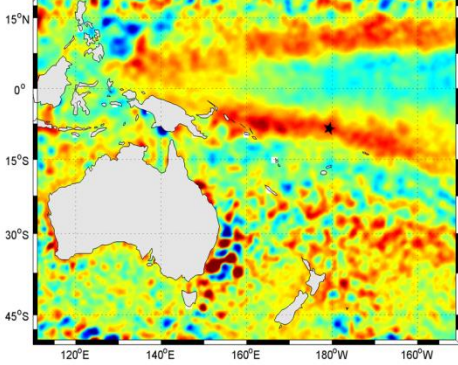

Sea Surface Height Anomaly 20060201

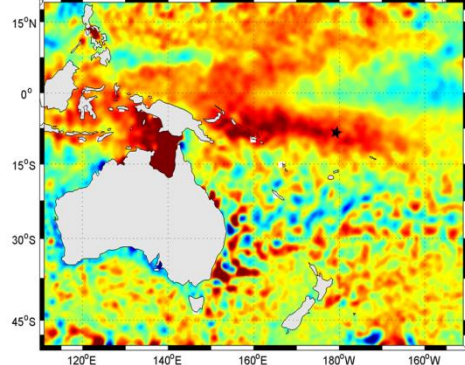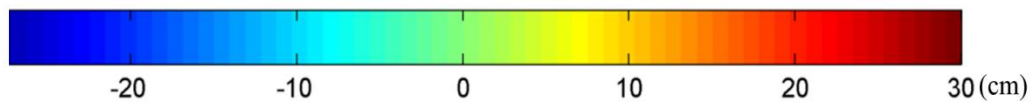



Sea Surface Height Anomaly 20060301

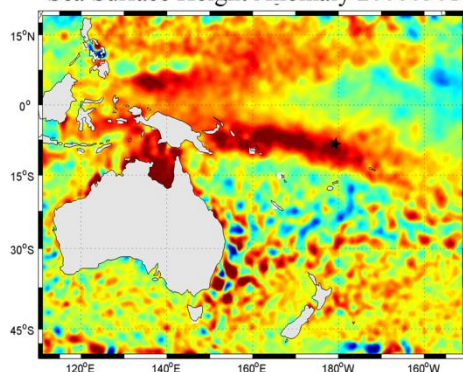

Sea Surface Height Anomaly 20060329

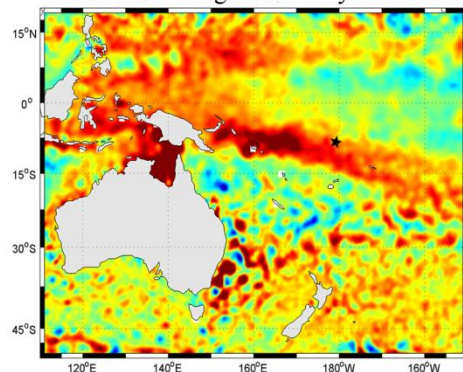

Sea Surface Height Anomaly 20070321

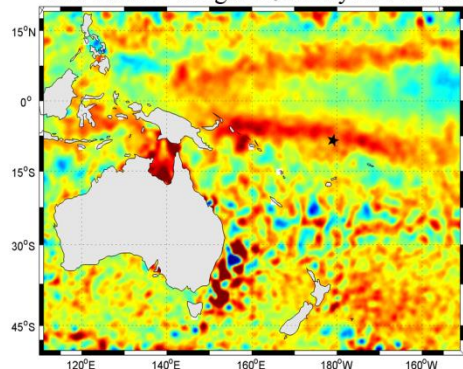

Sea Surface Height Anomaly 20070418

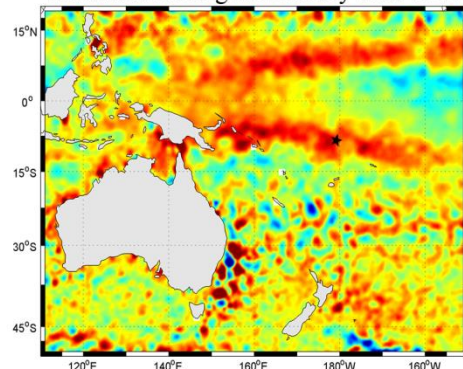

Sea Surface Height Anomaly 20080123

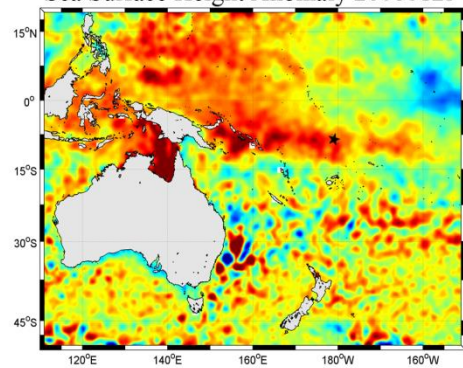

Sea Surface Height Anomaly 20090114

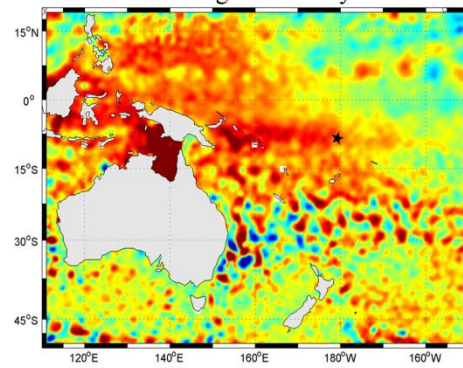

Sea Surface Height Anomaly 20090211

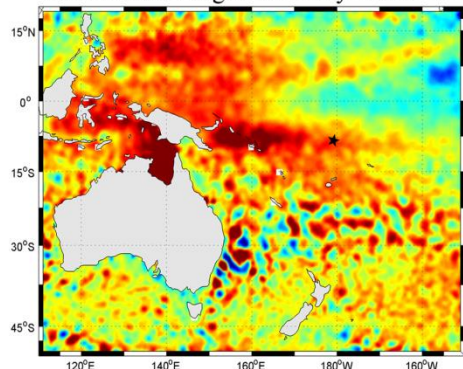

Sea Surface Height Anomaly 20100127

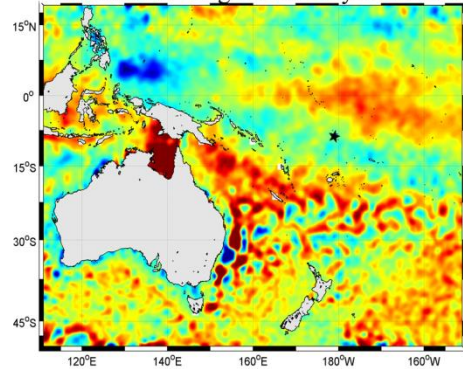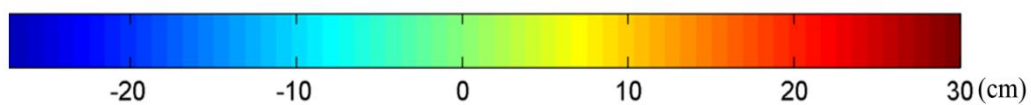

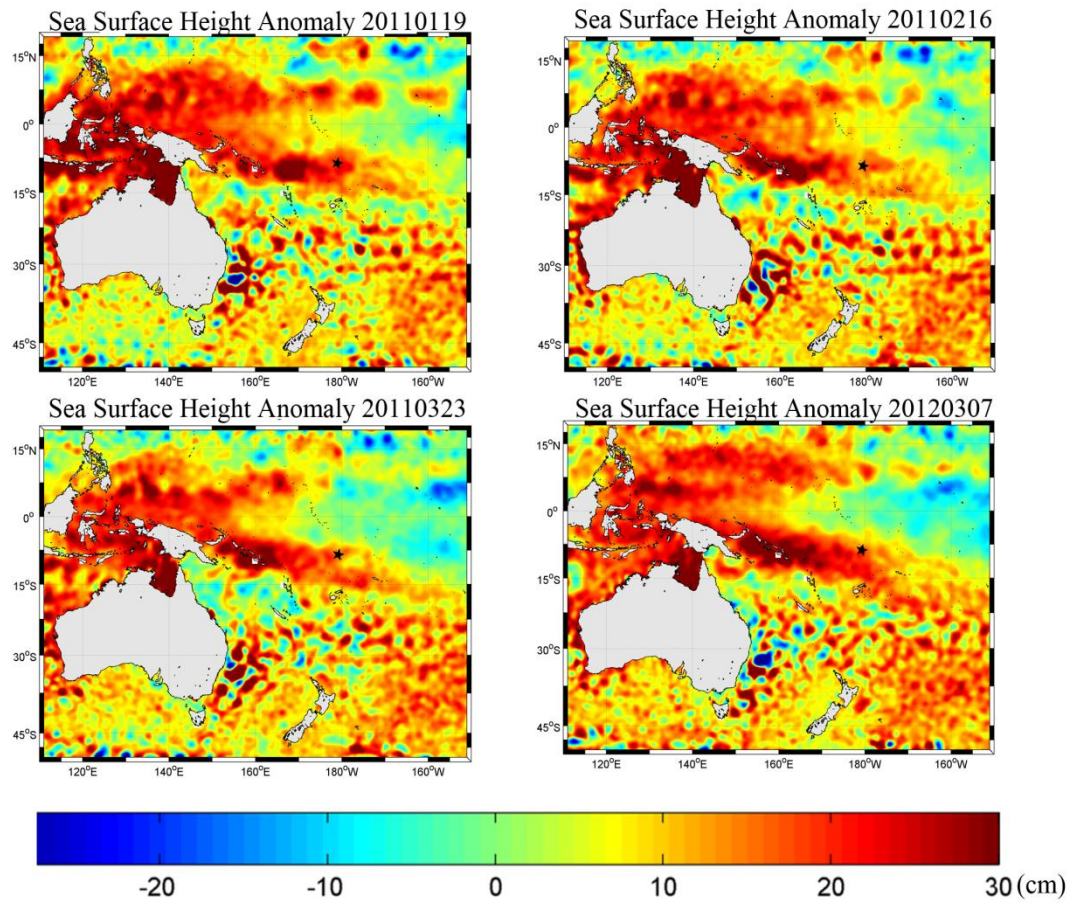

Figure S1. Maps of sea surface height anomaly during King Tide events. Star indicates the position of Tuvalu. The color bar shows the sea surface height anomaly by centimeter. Red color presents the warm-water effect; while blue presents the cold-water effect. The image is a 7-day average datum. The date indicated on the image is the middle date of the 7 days.
